# Supplementary material for: Palladium(ii) complexes of 2,2′-tellurobis(N,N-diphenyl acetamide): efficient catalysts for Suzuki–Miyaura coupling at room temperature under air
Source: Royal Society of Chemistry journal article supplement (doi:10.1039/d1nj03162g), 2021-12-15
Supplement: d1nj03162g1.pdf [file d1nj03162g1.pdf]

=====  
"Electronic Supplementary Information (ESI) to be published electronically"  
=====

FOR

**Palladium(II) complexes of 2,2'-tellurobis(*N,N*-diphenyl acetamide): efficient catalysts for Suzuki-Miyaura coupling at room temperature under air**

**Poornima Singh<sup>\*a</sup> and Ajai K. Singh<sup>\*a</sup>**

*<sup>a</sup>Department of Chemistry, Indian Institute of Technology Delhi, New Delhi-110016, India*

E-mail address: poornima05singh@gmail.com, [aksingh@chemistry.iitd.ac.in](mailto:aksingh@chemistry.iitd.ac.in);

Tel : 91 (011) 25691379

| <b>Contents</b>                                                                                                              | <b>Page. No.</b> |
|------------------------------------------------------------------------------------------------------------------------------|------------------|
| 1. Multi nuclear NMR and mass spectra of <b>L1</b> : Figures S1–S4                                                           | 2–3              |
| 2. Multi nuclear NMR and mass spectra of <b>L2</b> : Figures S5–S8                                                           | 4–5              |
| 3. Multi nuclear NMR of <b>C1</b> : Figures S9–S12                                                                           | 6–7              |
| 4. Multi nuclear NMR of <b>C2</b> : Figures S13–S16                                                                          | 8–9              |
| 5. Multi nuclear NMR of <b>C3</b> : Figures S17–S20                                                                          | 10–11            |
| 6. Crystal data and structural refinement parameters of <b>L1</b> , <b>L2</b> , <b>C1</b> , <b>C2</b> & <b>C3</b> : Table S1 | 12               |
| 7. Intermolecular interactions of <b>L1</b> , <b>L2</b> , <b>C1</b> & <b>C2</b> : Figures S21–S24                            | 13–14            |
| 8. Selected bond lengths and bond angles of <b>L1</b> , <b>L2</b> , <b>C1</b> , <b>C2</b> & <b>C3</b> : Table S2             | 15–19            |
| 9. Parametric details of weak C–H···O, C–H···Cl and C–H···Br interactions: Table S3                                          | 20               |
| 10. C–C coupled product NMR spectra data                                                                                     | 21–24            |

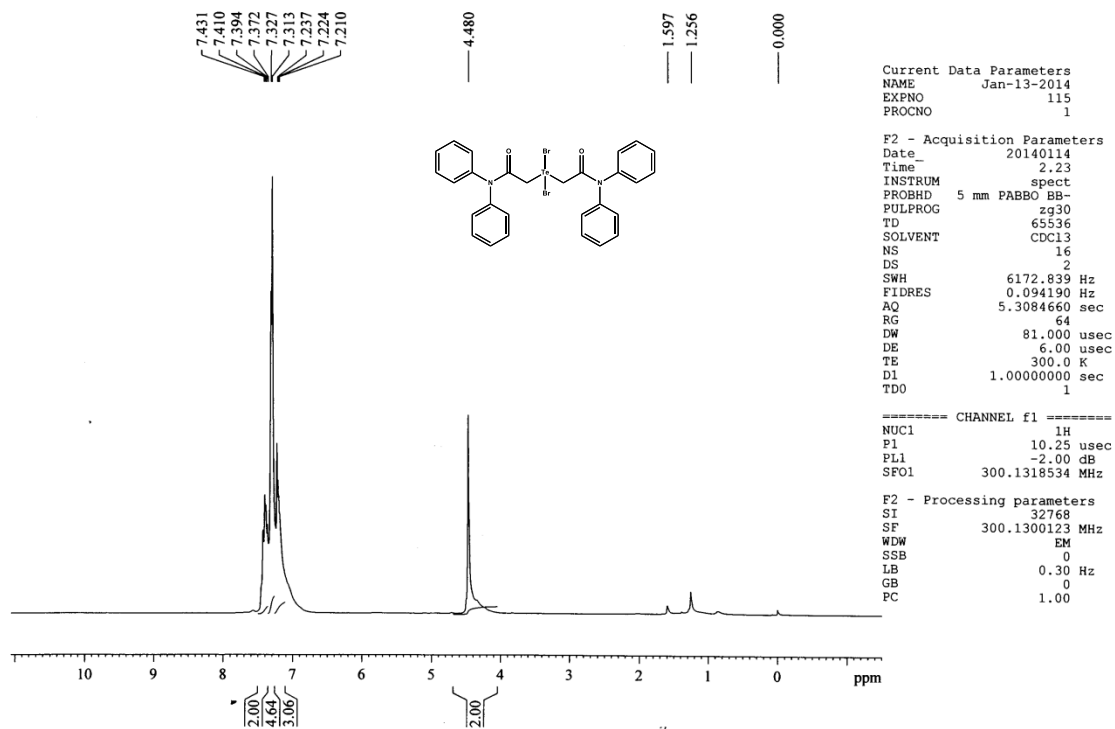

Figure S1. <sup>1</sup>H NMR of L1

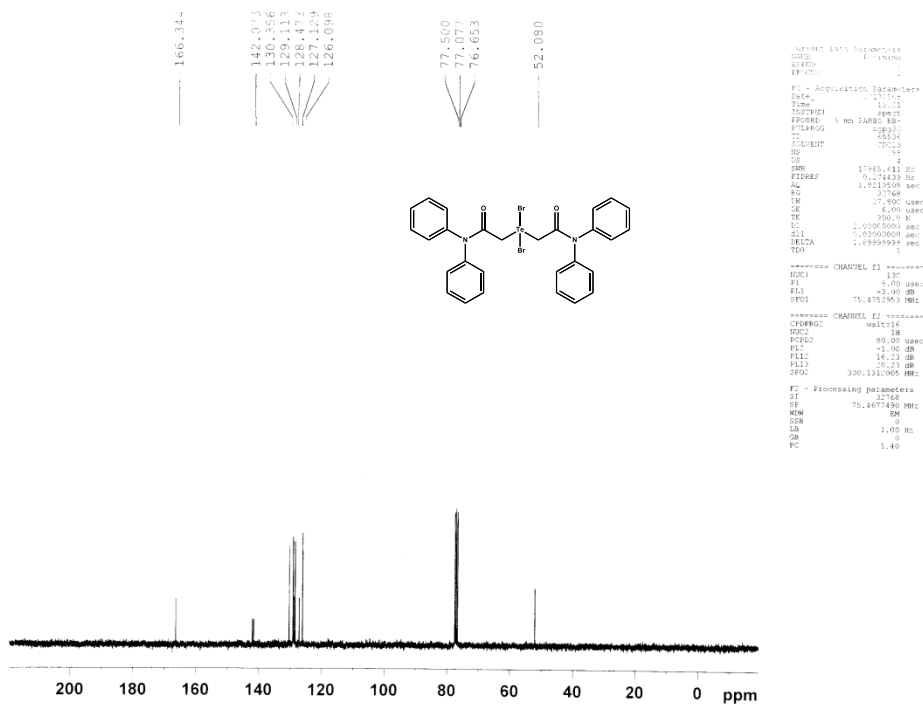

Figure S2. <sup>13</sup>C{<sup>1</sup>H} NMR of L1

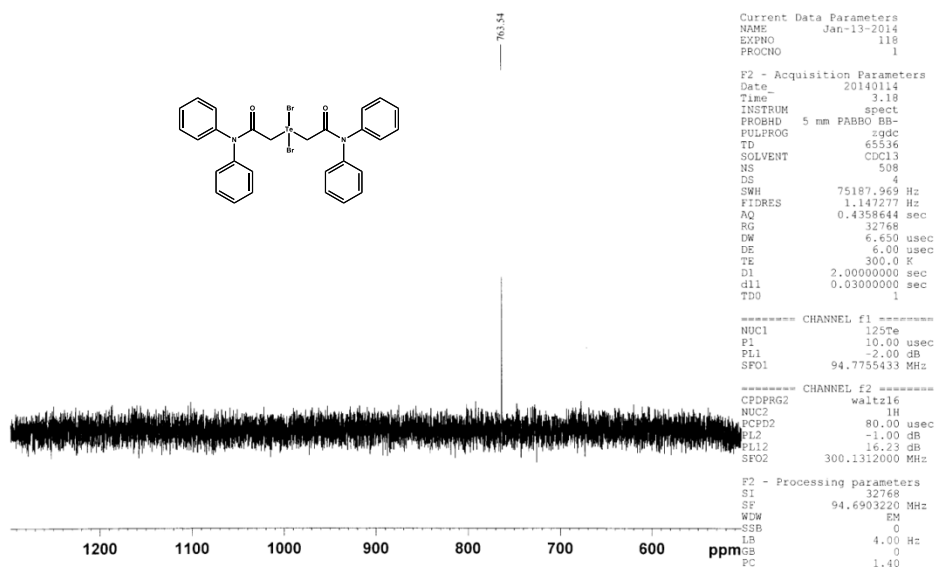Figure S3.  $^{125}\text{Te}\{^1\text{H}\}$  NMR of L1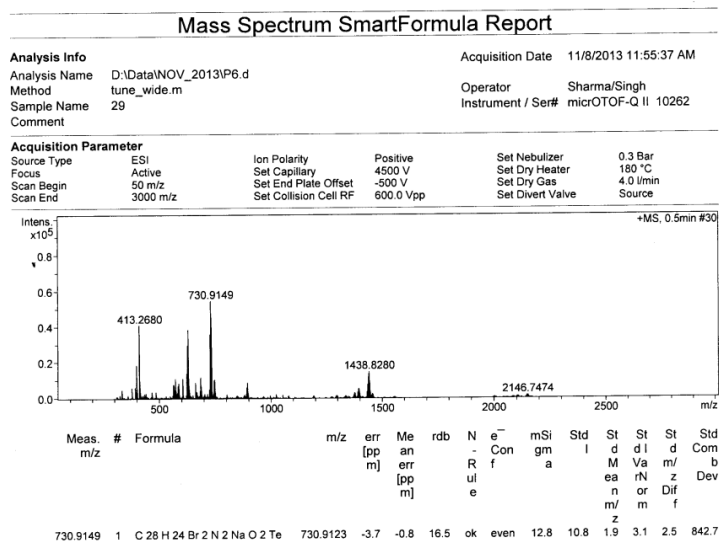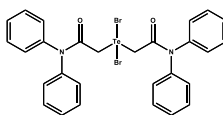

Figure S4. Mass Spectrum of L1

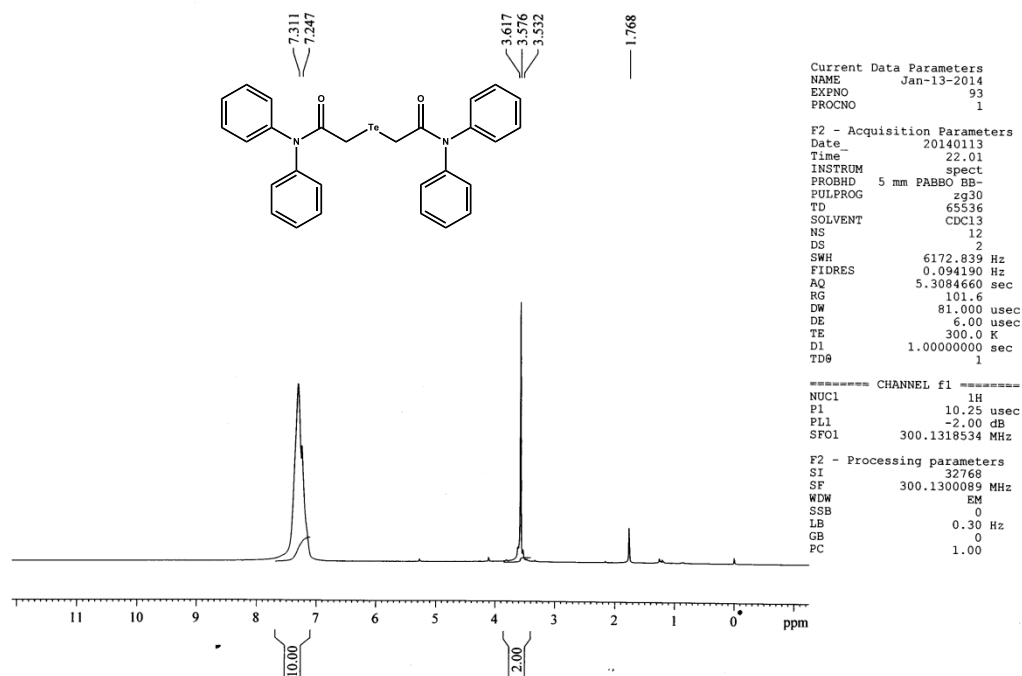Figure S5.  $^1\text{H}$  NMR of L2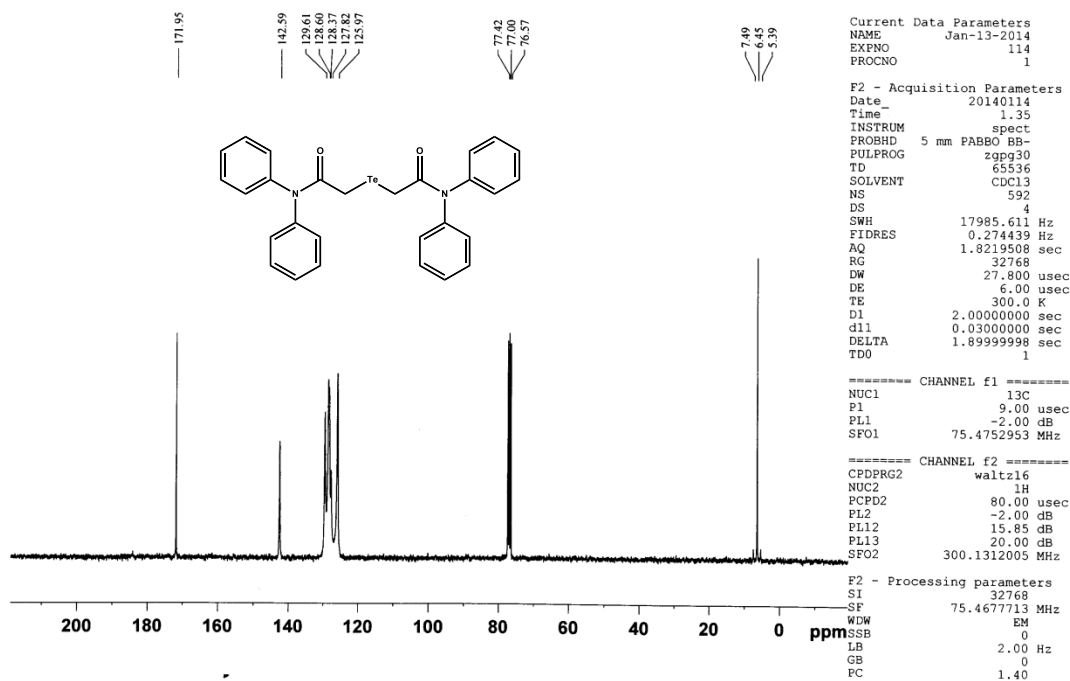Figure S6.  $^{13}\text{C}\{^1\text{H}\}$  NMR of L2

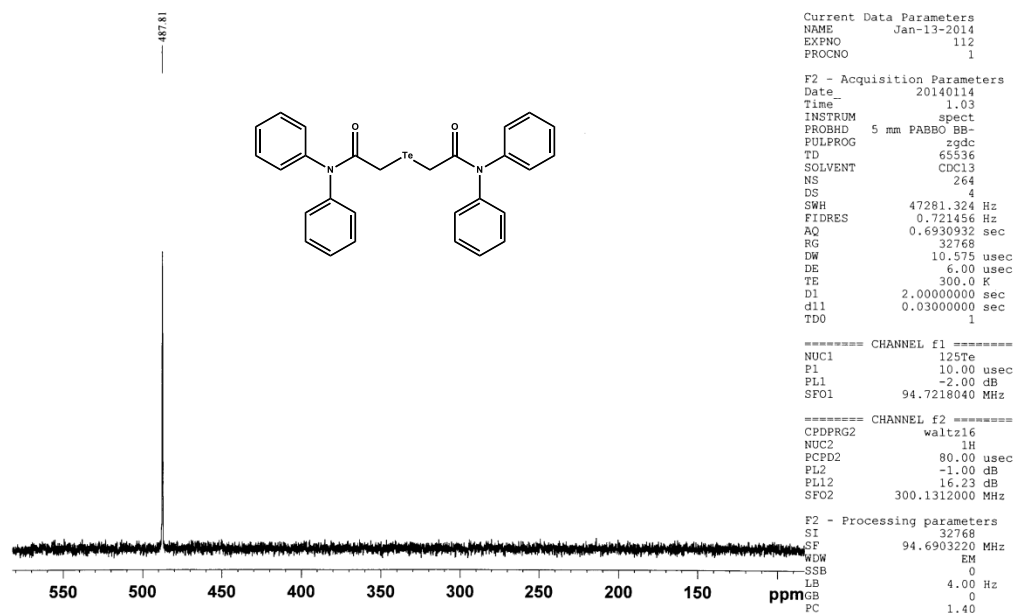Figure S7.  $^{125}\text{Te}\{^1\text{H}\}$  NMR of L2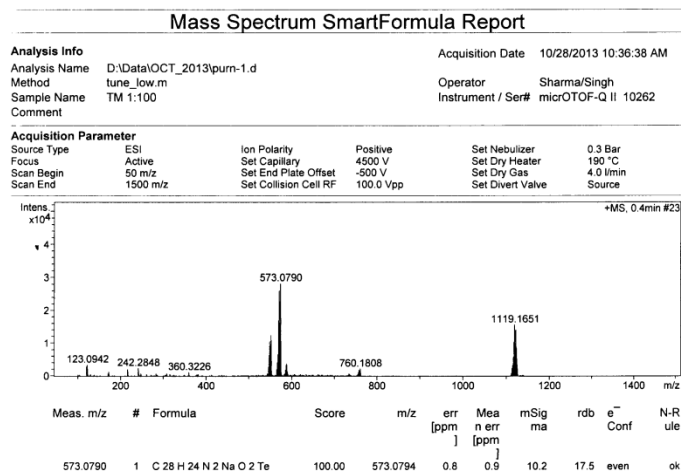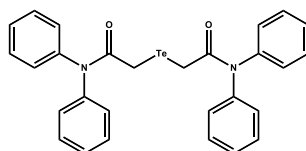

Figure S8. Mass Spectrum of L2

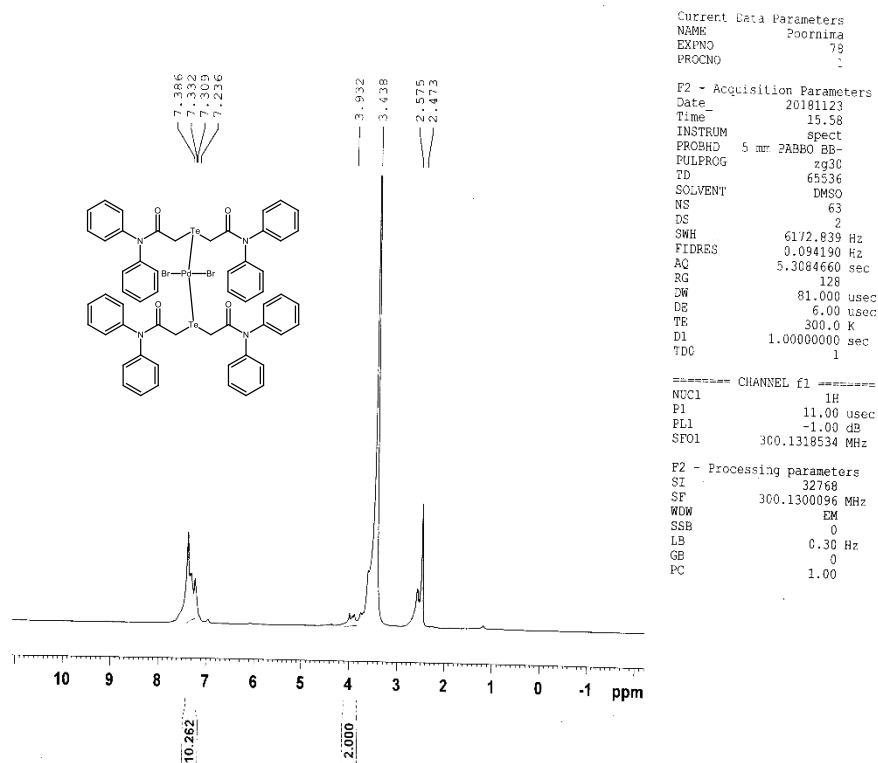

Figure S9. <sup>1</sup>H NMR of C1

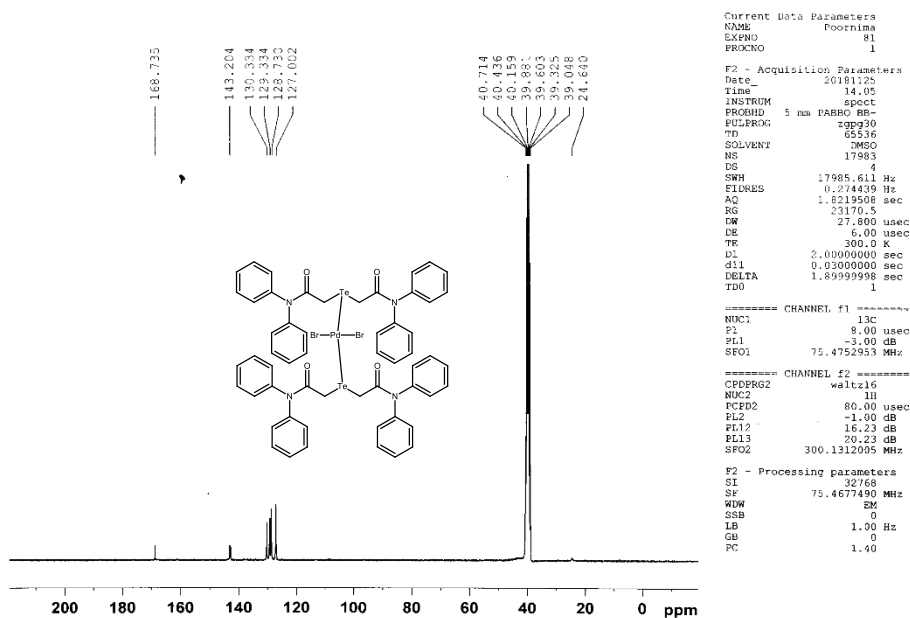

Figure S10. <sup>13</sup>C{<sup>1</sup>H} NMR of C1

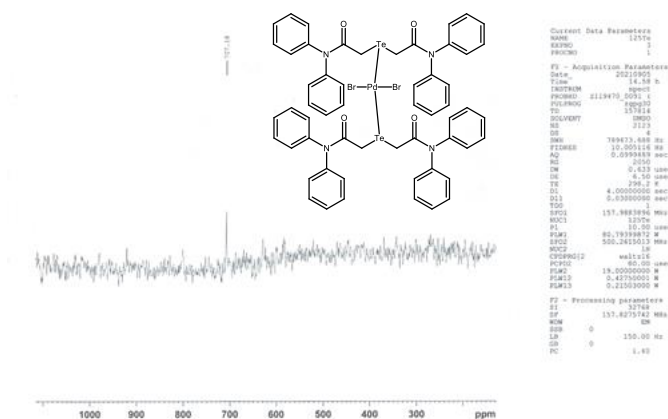Figure S11.  $^{125}\text{Te}\{^1\text{H}\}$  NMR of C1

D:\Year 2021\MS SPECTRA\_SP-C1-1

10/05/21 16:37:35

SP-C1-1

SP-C1-1 #10-14 RT: 0.18-0.26 AV: 5 SB: 6 0.04-0.08, 0.55-0.59 NL: 1.09E7  
T: FTMS + p ESI Full ms [166.70-2500.00]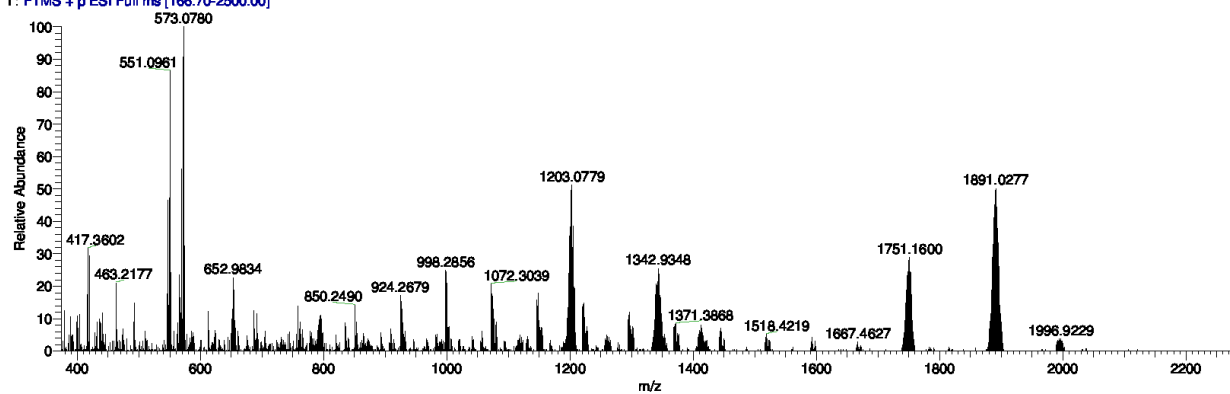SP-C1-1 #10-14 RT: 0.18-0.26 AV: 5 SB: 6 0.04-0.08, 0.55-0.59 NL: 5.57E6  
T: FTMS + p ESI Full ms [166.70-2500.00]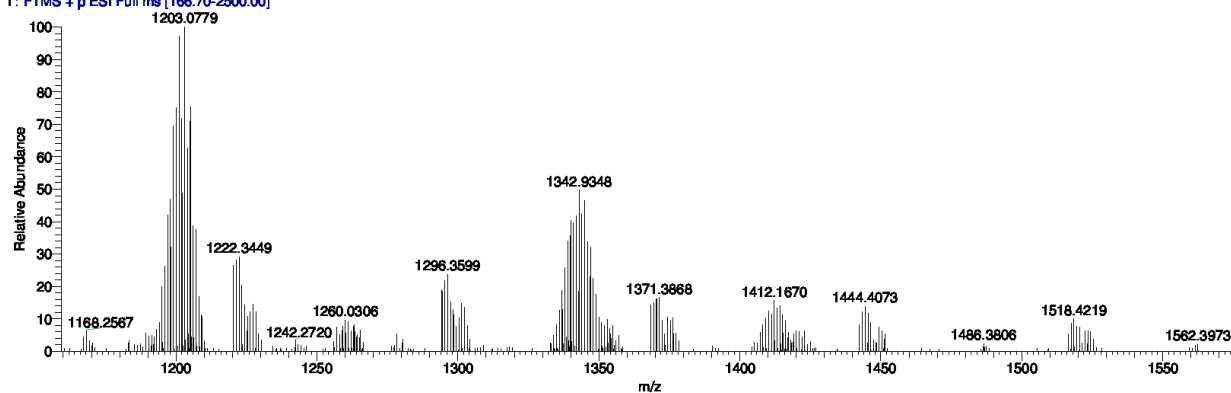

Figure S12. Mass Spectrum of C1

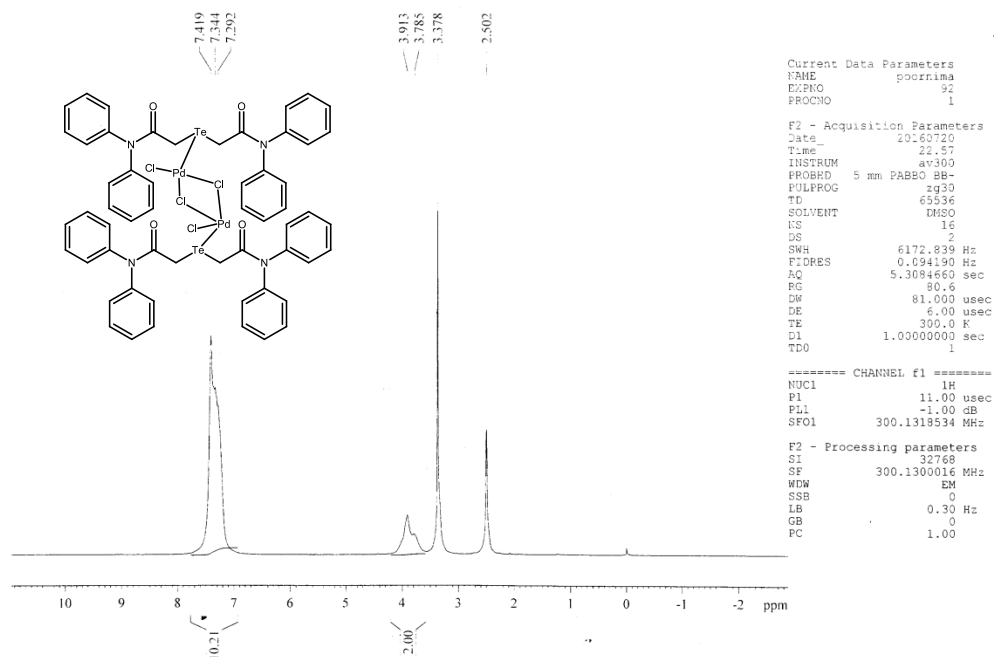Figure S13.  $^1\text{H}$  NMR of C2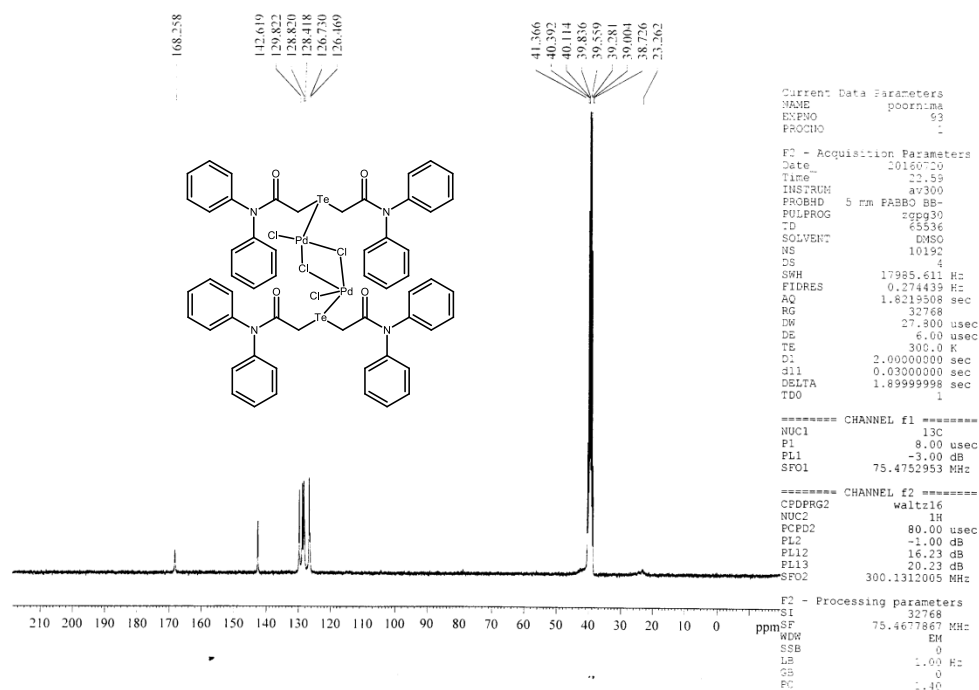Figure S14.  $^{13}\text{C}\{^1\text{H}\}$  NMR of C2



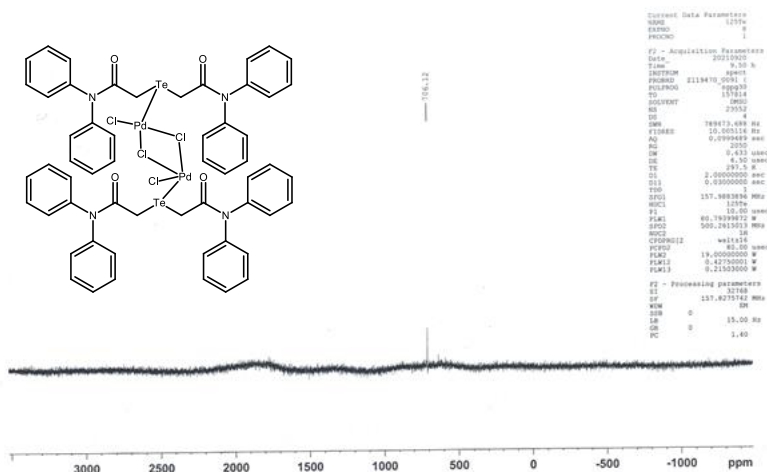

Figure 15.  $^{125}\text{Te}\{^1\text{H}\}$  NMR of C2

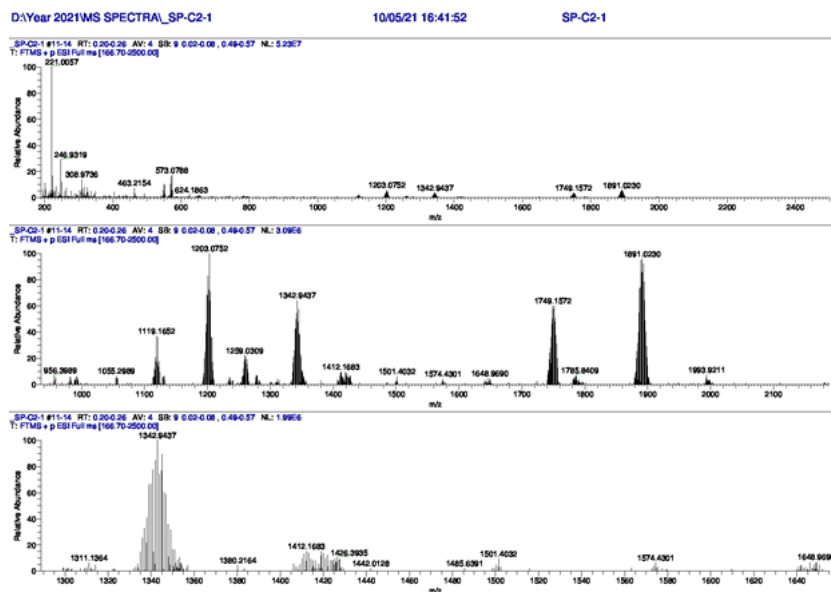

Figure S16. Mass Spectrum of C2

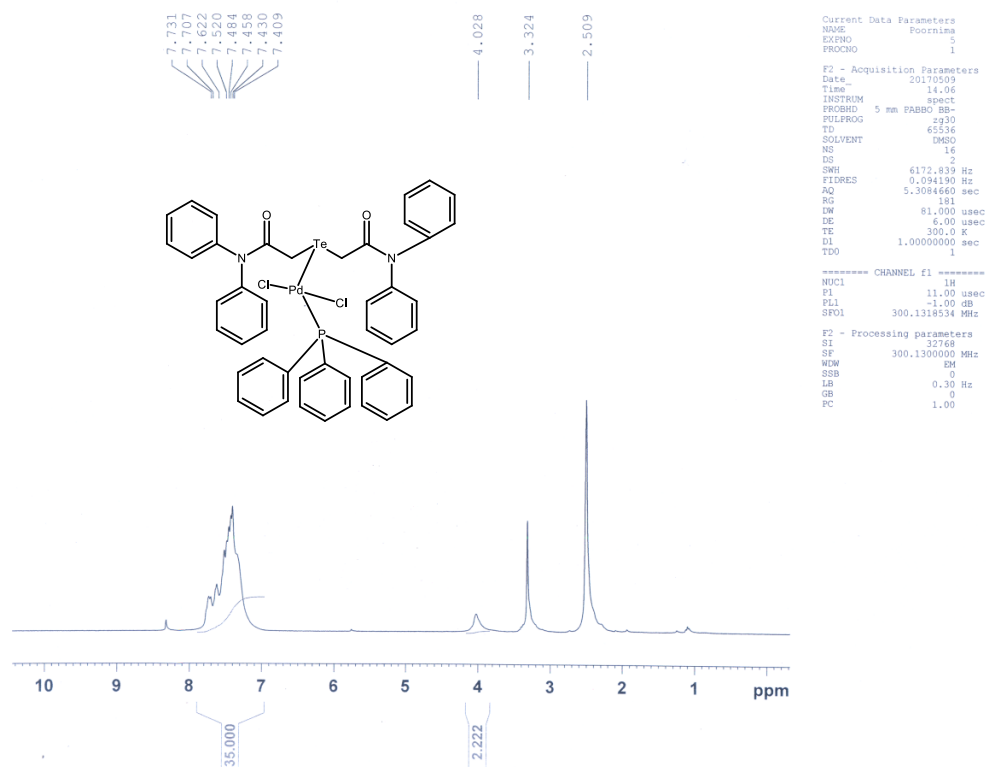Figure S17.  $^1\text{H}$  NMR of C3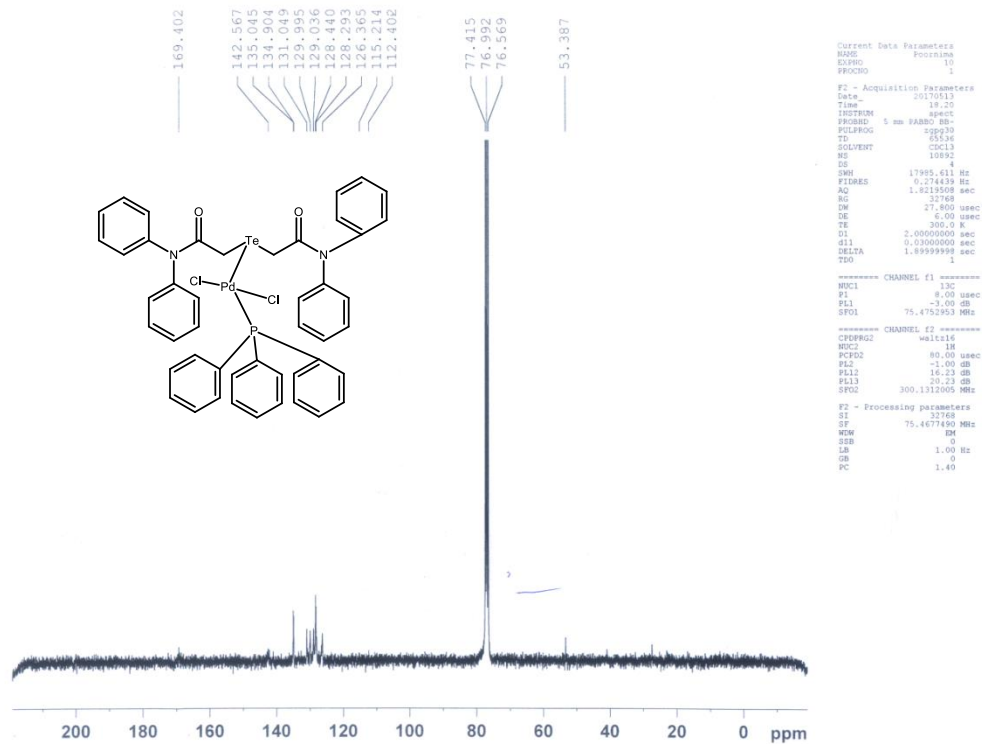Figure S18.  $^{13}\text{C}\{^1\text{H}\}$  NMR of C3



**Table S1**  
**Crystal Data and Structure Refinement Details for Ligands (L1, L2) and Complexes (C1, C2, C3)**

|                                             | L1                                                                               | L2                                                               | C1                                                                                                                                | C2                                                                                                            | C3                                                                                                                                   |
|---------------------------------------------|----------------------------------------------------------------------------------|------------------------------------------------------------------|-----------------------------------------------------------------------------------------------------------------------------------|---------------------------------------------------------------------------------------------------------------|--------------------------------------------------------------------------------------------------------------------------------------|
| Empirical formula                           | C <sub>28</sub> H <sub>24</sub> Br <sub>2</sub> N <sub>2</sub> O <sub>2</sub> Te | C <sub>28</sub> H <sub>24</sub> N <sub>2</sub> O <sub>2</sub> Te | C <sub>56</sub> H <sub>48</sub> Br <sub>1.29</sub> Cl <sub>0.71</sub> N <sub>4</sub> O <sub>4</sub> PdTe <sub>2</sub> [+ solvent] | C <sub>56</sub> H <sub>48</sub> Cl <sub>4</sub> N <sub>4</sub> O <sub>4</sub> Pd <sub>2</sub> Te <sub>2</sub> | C <sub>46</sub> H <sub>39</sub> Cl <sub>2</sub> N <sub>2</sub> O <sub>2</sub> PPdTe. 2(CH <sub>2</sub> Cl <sub>2</sub> ) [+ solvent] |
| Formula mass (g mol <sup>-1</sup> )         | 707.89                                                                           | 548.09                                                           | 1330.74                                                                                                                           | 1450.78                                                                                                       | 1157.51                                                                                                                              |
| Temperature (K)                             | 299(2)                                                                           | 293(2)                                                           | 293(2)                                                                                                                            | 298(2)                                                                                                        | 298(2)                                                                                                                               |
| Wavelength, λ (Å)                           | 0.71073                                                                          | 0.71073                                                          | 0.71073                                                                                                                           | 0.71073                                                                                                       | 0.71073                                                                                                                              |
| Crystal system                              | Monoclinic                                                                       | Triclinic                                                        | Triclinic                                                                                                                         | Monoclinic                                                                                                    | Monoclinic                                                                                                                           |
| Crystal size (mm <sup>3</sup> )             | 0.36 x 0.29 x 0.15                                                               | 0.33 x 0.31 x 0.30                                               | 0.31 x 0.29 x 0.28                                                                                                                | 0.32 x 0.31 x 0.30                                                                                            | 0.33 x 0.31 x 0.29                                                                                                                   |
| Space group                                 | C 2/c                                                                            | P -1                                                             | P -1                                                                                                                              | P2 <sub>1</sub> /n                                                                                            | P2 <sub>1</sub> /c                                                                                                                   |
| a (Å)                                       | 17.4421(13)                                                                      | 9.448(2)                                                         | 11.649(2)                                                                                                                         | 12.665(2)                                                                                                     | 13.32(2)                                                                                                                             |
| b (Å)                                       | 8.7369(6)                                                                        | 10.736(2)                                                        | 12.518(3)                                                                                                                         | 16.115(3)                                                                                                     | 23.67(5)                                                                                                                             |
| c (Å)                                       | 18.3468(13)                                                                      | 13.107(3)                                                        | 12.546(3)                                                                                                                         | 14.020(2)                                                                                                     | 16.79(3)                                                                                                                             |
| α (deg)                                     | 90                                                                               | 73.175(4)                                                        | 98.174(4)                                                                                                                         | 90                                                                                                            | 90                                                                                                                                   |
| β (deg)                                     | 94.406(2)                                                                        | 72.501(4)                                                        | 106.150(3)                                                                                                                        | 93.688(4)                                                                                                     | 106.18(2)                                                                                                                            |
| γ (deg)                                     | 90                                                                               | 79.615(4)                                                        | 112.524(3)                                                                                                                        | 90                                                                                                            | 90                                                                                                                                   |
| V (Å <sup>3</sup> )                         | 2787.6(3)                                                                        | 1207.3(4)                                                        | 1558.2(6)                                                                                                                         | 2855.5(8)                                                                                                     | 5084(16)                                                                                                                             |
| Z                                           | 4                                                                                | 2                                                                | 1                                                                                                                                 | 2                                                                                                             | 4                                                                                                                                    |
| ρ <sub>calcd</sub> (Mg m <sup>-3</sup> )    | 1.687                                                                            | 1.508                                                            | 1.433                                                                                                                             | 1.687                                                                                                         | 1.512                                                                                                                                |
| Absorption coefficient (mm <sup>-1</sup> )  | 3.961                                                                            | 1.259                                                            | 2.113                                                                                                                             | 1.865                                                                                                         | 1.312                                                                                                                                |
| F(000)                                      | 1376                                                                             | 548.0                                                            | 656.8                                                                                                                             | 1416                                                                                                          | 2304                                                                                                                                 |
| h, k, l ranges collected                    | -24→23                                                                           | -12→12                                                           | -13→13                                                                                                                            | -17→17                                                                                                        | -17→17                                                                                                                               |
|                                             | -12→11                                                                           | -14→13                                                           | -14→14                                                                                                                            | -21→21                                                                                                        | -30→31                                                                                                                               |
|                                             | -25→25                                                                           | -17→17                                                           | -14→14                                                                                                                            | -18→18                                                                                                        | -21→21                                                                                                                               |
| Reflection collected                        | 31200                                                                            | 14354                                                            | 15045                                                                                                                             | 35428                                                                                                         | 60756                                                                                                                                |
| Independent reflections                     | 3921 [R(int) = 0.0776]                                                           | 6060 [R(int) = 0.0265]                                           | 5486 [R(int) = 0.0398]                                                                                                            | 7259 [R(int) = 0.0772]                                                                                        | 12752 [R(int) = 0.1188]                                                                                                              |
| θ range (°)                                 | 2.227–29.592                                                                     | 1.68–28.39                                                       | 2.547–22.215                                                                                                                      | 1.93–28.52                                                                                                    | 2.384–21.621                                                                                                                         |
| Completeness to θ <sub>max</sub> (%)        | 100                                                                              | 99.8                                                             | 99.5                                                                                                                              | 97.4                                                                                                          | 99.9                                                                                                                                 |
| Absorption correction                       | Semi-empirical from equivalents                                                  |                                                                  |                                                                                                                                   |                                                                                                               |                                                                                                                                      |
| Max., min. transmission                     | 0.543, 0.268                                                                     | 0.683, 0.669                                                     | 0. 0.553, 0.525                                                                                                                   | 0.568, 0.558                                                                                                  | 0.684, 0.655                                                                                                                         |
| Refinement method                           | Full-matrix least-squares on F <sup>2</sup>                                      |                                                                  |                                                                                                                                   |                                                                                                               |                                                                                                                                      |
| Data/restraints /parameters                 | 3921 / 0 / 159                                                                   | 6060 / 0 / 298                                                   | 5486 / 0 / 317                                                                                                                    | 7259 / 0 / 325                                                                                                | 12752 / 7 / 544                                                                                                                      |
| Goodness of fit on F <sup>2</sup>           | 0.932                                                                            | 0.985                                                            | 1.120                                                                                                                             | 0.982                                                                                                         | 0.902                                                                                                                                |
| Final R indices (I > 2σ(I))                 | R1 = 0.0337, wR2 = 0.1115                                                        | R1 = 0.0369, wR2 = 0.0776                                        | R1 = 0.0553, wR2 = 0.1290                                                                                                         | R1 = 0.0397, wR2 = 0.0706                                                                                     | R1 = 0.0588, wR2 = 0.1298                                                                                                            |
| R indices (all data)                        | R1 = 0.0492, wR2 = 0.1301                                                        | R1 = 0.0559, wR2 = 0.0840                                        | R1 = 0.0695, wR2 = 0.1345                                                                                                         | R1 = 0.0795, wR2 = 0.0823                                                                                     | R1 = 0.1251, wR2 = 0.1480                                                                                                            |
| Largest diff peak/hole (e Å <sup>-3</sup> ) | 0.715/-1.094                                                                     | 0.600/-0.264                                                     | 1.09/-1.25                                                                                                                        | 0.969/-0.905                                                                                                  | 0.85/-1.18                                                                                                                           |
| Extinction coefficient                      | –                                                                                | –                                                                | –                                                                                                                                 | –                                                                                                             | –                                                                                                                                    |

## Intermolecular Structures of L1, L2, C1, C2 and C3

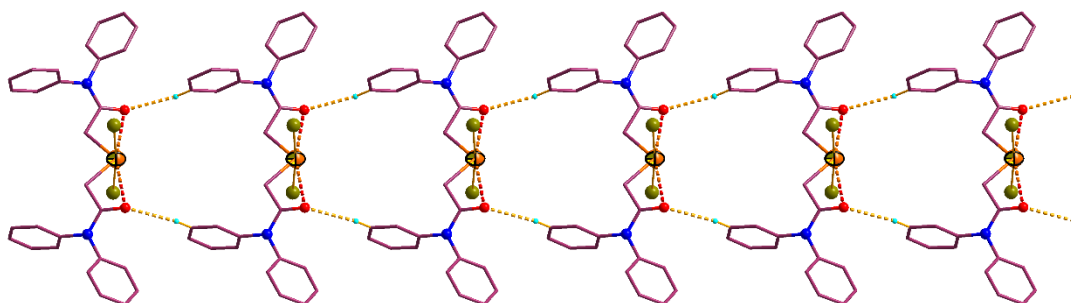

**Figure S21.** Supramolecular Structure due to C–H...O Interactions in the Crystal Lattice of **L1**.

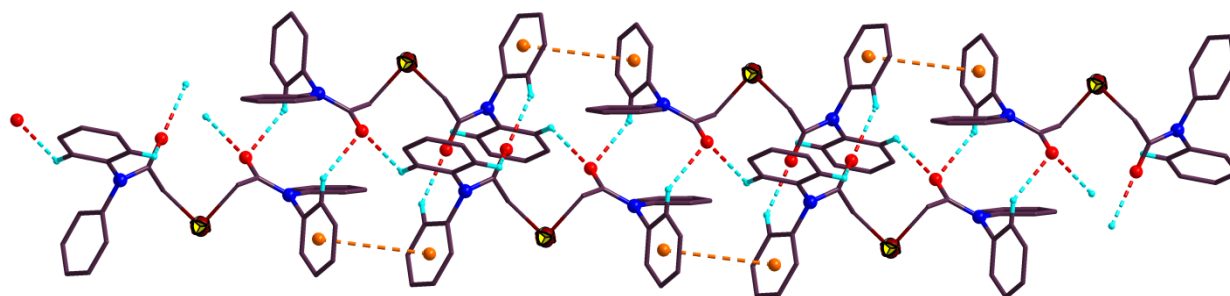

**Figure S22.**  $\pi$ - $\pi$  and C–H...O Interactions in the Crystal Lattice of **L2**.

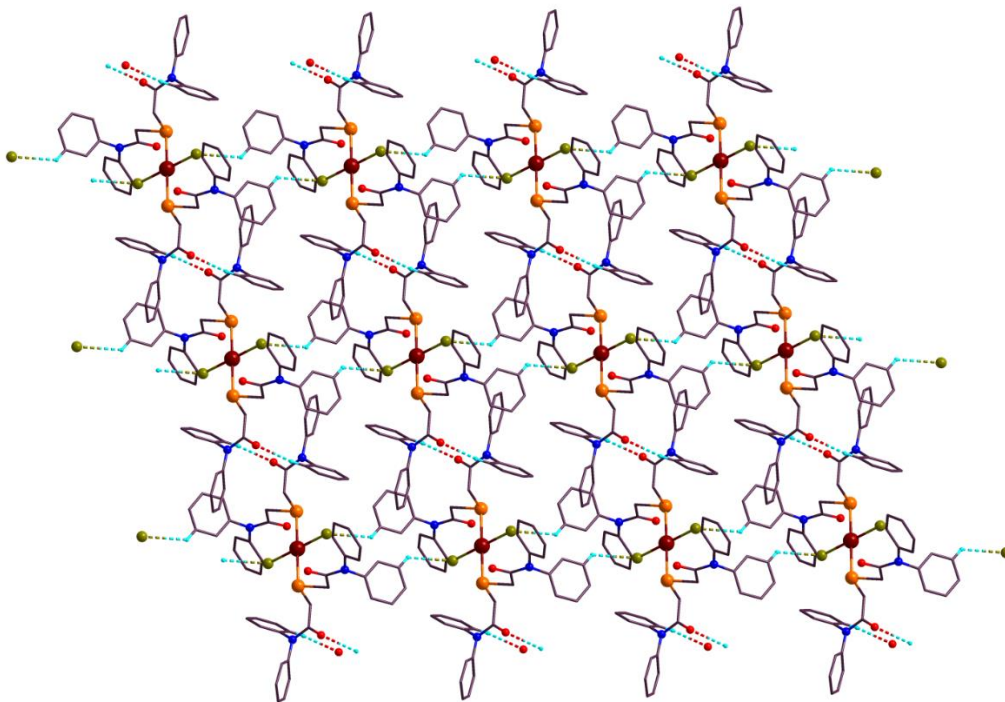

**Figure S23.** Supramolecular Structure due to Intermolecular C–H...O and C–H...Br Interactions in **C1**.

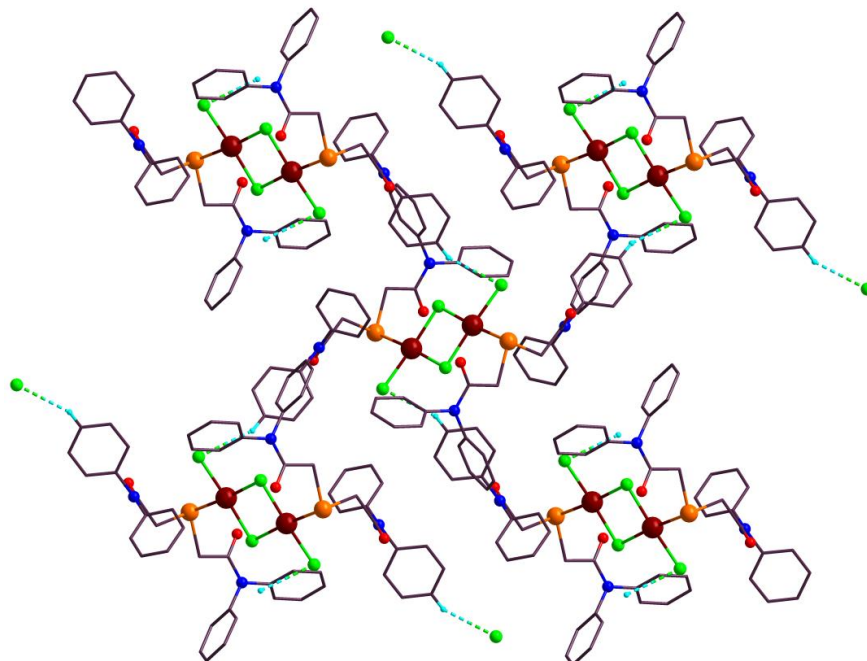

**Figure S24.** Supramolecular Structure due to Intermolecular C–H...Cl Interactions in the Crystal of **C2**.

Table S2

Selected bond lengths [ $\text{\AA}$ ] and bond angles [ $^\circ$ ]

| Compounds   | Bond length [ $\text{\AA}$ ] | Bond angle [ $^\circ$ ] |                       |                   |
|-------------|------------------------------|-------------------------|-----------------------|-------------------|
| <b>L1</b>   | Te(1)-C(14)                  | 2.121(3)                | C(14)-Te(1)-C(14)#1   | 91.15(16)         |
|             | Te(1)-C(14)#1                | 2.121(3)                | C(14)-Te(1)-Br(1)     | 85.19(9)          |
|             | Te(1)-Br(1)                  | 2.6629(5)               | C(14)#1-Te(1)-Br(1)   | 91.18(9)          |
|             | Te(1)-Br(1)#1                | 2.6629(5)               | C(14)-Te(1)-Br(1)#1   | 91.17(9)          |
|             | O(1)-C(13)                   | 1.219(4)                | C(14)#1-Te(1)-Br(1)#1 | 85.18(9)          |
|             | N(1)-C(13)                   | 1.355(3)                | Br(1)-Te(1)-Br(1)#1   | 174.80(2)         |
|             | N(1)-C(6)                    | 1.439(3)                | C(13)-N(1)-C(6)       | 119.6(2)          |
|             | N(1)-C(7)                    | 1.452(3)                | C(13)-N(1)-C(7)       | 121.1(2)          |
|             | C(6)-C(1)                    | 1.376(4)                | C(6)-N(1)-C(7)        | 119.2(2)          |
|             | C(6)-C(5)                    | 1.387(4)                | C(1)-C(6)-C(5)        | 120.1(3)          |
|             | C(13)-C(14)                  | 1.513(4)                | C(1)-C(6)-N(1)        | 119.3(3)          |
|             | C(7)-C(12)                   | 1.365(4)                | C(5)-C(6)-N(1)        | 120.6(3)          |
|             | C(7)-C(8)                    | 1.375(4)                | O(1)-C(13)-N(1)       | 123.8(3)          |
|             | C(8)-C(9)                    | 1.380(5)                | O(1)-C(13)-C(14)      | 119.2(3)          |
|             | C(1)-C(2)                    | 1.381(5)                | N(1)-C(13)-C(14)      | 117.0(2)          |
|             | C(9)-C(10)                   | 1.353(7)                | C(12)-C(7)-C(8)       | 120.4(3)          |
|             | C(5)-C(4)                    | 1.384(6)                | C(12)-C(7)-N(1)       | 120.9(3)          |
|             | C(4)-C(3)                    | 1.362(7)                | C(8)-C(7)-N(1)        | 118.6(3)          |
|             | C(10)-C(11)                  | 1.373(6)                | C(13)-C(14)-Te(1)     | 104.65(18)        |
|             | C(12)-C(11)                  | 1.389(5)                | C(7)-C(8)-C(9)        | 119.4(4)          |
|             | C(3)-C(2)                    | 1.369(6)                | C(6)-C(1)-C(2)        | 119.4(3)          |
|             |                              |                         | C(10)-C(9)-C(8)       | 120.9(4)          |
|             |                              |                         | C(4)-C(5)-C(6)        | 118.8(4)          |
|             |                              |                         | C(3)-C(4)-C(5)        | 121.5(4)          |
|             |                              |                         | C(9)-C(10)-C(11)      | 119.7(4)          |
|             |                              |                         | C(7)-C(12)-C(11)      | 119.4(4)          |
|             |                              |                         | C(4)-C(3)-C(2)        | 119.1(4)          |
|             |                              |                         | C(3)-C(2)-C(1)        | 121.1(4)          |
|             |                              |                         | C(10)-C(11)-C(12)     | 120.2(4)          |
|             | <b>L2</b>                    | Te(1)-C(14)             | 2.149(3)              | C(14)-Te(1)-C(15) |
| Te(1)-C(15) |                              | 2.150(3)                | C(13)-N(1)-C(6)       | 122.2(2)          |
| N(1)-C(13)  |                              | 1.381(4)                | C(13)-N(1)-C(12)      | 121.1(2)          |
| N(1)-C(6)   |                              | 1.434(4)                | C(6)-N(1)-C(12)       | 116.7(2)          |
| N(1)-C(7)   |                              | 1.444(3)                | C(11)-C(12)-C(7)      | 120.3(2)          |
| C(12)-C(11) |                              | 1.369(4)                | C(11)-C(12)-N(1)      | 119.1(2)          |
| C(12)-C(7)  |                              | 1.375(4)                | C(7)-C(12)-N(1)       | 120.6(2)          |
| C(6)-C(1)   |                              | 1.376(4)                | C(1)-C(6)-C(5)        | 119.2(3)          |
| C(6)-C(5)   |                              | 1.377(4)                | C(1)-C(6)-N(1)        | 119.0(2)          |
| C(17)-C(18) |                              | 1.373(4)                | C(5)-C(6)-N(1)        | 121.7(3)          |
| C(17)-C(22) |                              | 1.381(4)                | C(18)-C(17)-C(22)     | 119.5(3)          |
| C(17)-N(2)  |                              | 1.437(3)                | C(18)-C(17)-N(2)      | 121.3(2)          |
| C(15)-C(16) |                              | 1.498(4)                | C(22)-C(17)-N(2)      | 119.2(2)          |
| C(11)-C(10) |                              | 1.371(4)                | C(16)-C(15)-Te(1)     | 109.37(17)        |
| C(1)-C(2)   |                              | 1.380(4)                | C(12)-C(11)-C(10)     | 120.0(3)          |
| C(7)-C(8)   |                              | 1.380(4)                | C(6)-C(1)-C(2)        | 120.7(3)          |
| O(2)-C(16)  |                              | 1.218(3)                | C(12)-C(7)-C(8)       | 119.1(3)          |
| C(24)-C(23) |                              | 1.371(4)                | C(23)-C(24)-C(25)     | 120.2(3)          |
| C(24)-C(25) |                              | 1.383(4)                | C(16)-N(2)-C(23)      | 122.9(2)          |

|           |               |           |                     |            |
|-----------|---------------|-----------|---------------------|------------|
|           | N(2)-C(16)    | 1.375(3)  | C(16)-N(2)-C(17)    | 120.1(2)   |
|           | N(2)-C(23)    | 1.436(3)  | C(23)-N(2)-C(17)    | 117.0(2)   |
|           | C(23)-C(28)   | 1.386(4)  | O(2)-C(16)-N(2)     | 121.4(3)   |
|           | C(28)-C(27)   | 1.374(4)  | O(2)-C(16)-C(15)    | 121.2(2)   |
|           | C(27)-C(26)   | 1.367(5)  | N(2)-C(16)-C(15)    | 117.4(2)   |
|           | C(25)-C(26)   | 1.375(5)  | C(24)-C(23)-C(28)   | 119.6(3)   |
|           | C(19)-C(20)   | 1.373(5)  | C(24)-C(23)-N(2)    | 119.8(2)   |
|           | C(19)-C(18)   | 1.386(4)  | C(28)-C(23)-N(2)    | 120.6(3)   |
|           | C(14)-C(13)   | 1.494(4)  | C(27)-C(28)-C(23)   | 119.4(3)   |
|           | C(8)-C(9)     | 1.358(5)  | C(26)-C(27)-C(28)   | 121.4(3)   |
|           | C(21)-C(20)   | 1.365(5)  | C(26)-C(25)-C(24)   | 120.3(3)   |
|           | C(21)-C(22)   | 1.381(4)  | C(27)-C(26)-C(25)   | 119.1(3)   |
|           | C(9)-C(10)    | 1.374(5)  | C(20)-C(19)-C(18)   | 119.9(3)   |
|           | C(5)-C(4)     | 1.387(5)  | C(13)-C(14)-Te(1)   | 109.79(19) |
|           | C(4)-C(3)     | 1.365(5)  | C(9)-C(8)-C(7)      | 120.8(3)   |
|           | C(2)-C(3)     | 1.356(5)  | C(20)-C(21)-C(22)   | 120.8(3)   |
|           | O(1)-C(13)    | 1.213(3)  | C(21)-C(22)-C(17)   | 119.7(3)   |
|           |               |           | C(21)-C(20)-C(19)   | 119.8(3)   |
|           |               |           | C(17)-C(18)-C(19)   | 120.4(3)   |
|           |               |           | C(8)-C(9)-C(10)     | 119.8(3)   |
|           |               |           | C(11)-C(10)-C(9)    | 120.1(3)   |
|           |               |           | C(6)-C(5)-C(4)      | 119.0(3)   |
|           |               |           | C(3)-C(4)-C(5)      | 121.3(3)   |
|           |               |           | C(3)-C(2)-C(1)      | 120.2(3)   |
|           |               |           | C(2)-C(3)-C(4)      | 119.5(3)   |
|           |               |           | O(1)-C(13)-N(1)     | 122.2(3)   |
|           |               |           | O(1)-C(13)-C(14)    | 119.9(3)   |
|           |               |           | N(1)-C(13)-C(14)    | 117.9(2)   |
| <b>C1</b> | Pd(1)-Te(1)   | 2.5652(5) | C(14)-Te(1)-Pd(1)   | 105.79(18) |
|           | Te(1)-C(14)   | 2.122(6)  | C(14)-Te(1)-C(15)   | 91.9(2)    |
|           | Te(1)-C(15)   | 2.162(6)  | C(15)-Te(1)-Pd(1)   | 98.32(17)  |
|           | Pd(1)-Br(1)#1 | 2.411(4)  | Te(1)-Pd(1)-Te(1)#1 | 180.00     |
|           | Pd(1)-Br(1)   | 2.411(4)  | Br(1)#1-Pd(1)-Te(1) | 84.51(12)  |
|           | Pd(1)-Cl(1)   | 2.30(2)   | Br(1)-Pd(1)-Te(1)   | 95.50(11)  |
|           | Pd(1)-Cl(1)#1 | 2.30(2)   | Cl(1)-Pd(1)-Te(1)   | 96.3(6)    |
|           | O(1)-C(13)    | 1.233(8)  | Cl(1)#1-Pd(1)-Te(1) | 83.7(6)    |
|           | O(2)-C(16)    | 1.224(7)  | Cl(1)#1-Pd(1)-Cl(1) | 180.00(17) |
|           | N(1)-C(6)     | 1.443(8)  | C(7)-N(1)-C(6)      | 116.9(5)   |
|           | N(1)-C(7)     | 1.425(8)  | C(13)-N(1)-C(6)     | 121.7(6)   |
|           | N(1)-C(13)    | 1.352(8)  | C(13)-N(1)-C(7)     | 121.3(5)   |
|           | N(2)-C(16)    | 1.363(8)  | C(16)-N(2)-C(17)    | 122.5(5)   |
|           | N(2)-C(17)    | 1.441(8)  | C(16)-N(2)-C(23)    | 120.0(5)   |
|           | N(2)-C(23)    | 1.431(8)  | C(23)-N(2)-C(17)    | 117.4(5)   |
|           | C(1)-C(2)     | 1.383(10) | C(6)-C(1)-C(2)      | 119.2(8)   |
|           | C(1)-C(6)     | 1.374(10) | C(3)-C(2)-C(1)      | 120.3(8)   |
|           | C(2)-C(3)     | 1.350(12) | C(4)-C(3)-C(2)      | 120.7(8)   |
|           | C(3)-C(4)     | 1.342(12) | C(3)-C(4)-C(5)      | 120.8(9)   |
|           | C(4)-C(5)     | 1.365(11) | C(4)-C(5)-C(6)      | 119.5(8)   |
|           | C(5)-C(6)     | 1.383(10) | C(1)-C(6)-N(1)      | 121.8(6)   |
|           | C(7)-C(8)     | 1.363(9)  | C(1)-C(6)-C(5)      | 119.6(7)   |
|           | C(7)-C(12)    | 1.368(9)  | C(5)-C(6)-N(1)      | 118.4(6)   |
|           | C(8)-C(9)     | 1.405(11) | C(8)-C(7)-N(1)      | 121.1(6)   |
|           | C(9)-C(10)    | 1.340(12) | C(8)-C(7)-C(12)     | 120.3(7)   |
|           | C(10)-C(11)   | 1.377(11) | C(12)-C(7)-N(1)     | 118.5(6)   |
|           | C(11)-C(12)   | 1.359(10) | C(7)-C(8)-C(9)      | 118.2(8)   |



|           |               |            |                     |            |
|-----------|---------------|------------|---------------------|------------|
|           | C(13)-C(14)   | 1.503(9)   | C(10)-C(9)-C(8)     | 121.0(8)   |
|           | C(15)-C(16)   | 1.516(9)   | C(9)-C(10)-C(11)    | 120.0(8)   |
|           | C(17)-C(18)   | 1.374(10)  | C(12)-C(11)-C(10)   | 119.5(8)   |
|           | C(17)-C(22)   | 1.347(9)   | C(11)-C(12)-C(7)    | 120.9(7)   |
|           | C(18)-C(19)   | 1.370(11)  | O(1)-C(13)-N(1)     | 123.6(6)   |
|           | C(19)-C(20)   | 1.361(13)  | O(1)-C(13)-C(14)    | 119.9(6)   |
|           | C(20)-C(21)   | 1.333(13)  | N(1)-C(13)-C(14)    | 116.6(6)   |
|           | C(21)-C(22)   | 1.393(11)  | C(13)-C(14)-Te(1)   | 108.0(4)   |
|           | C(23)-C(24)   | 1.390(9)   | C(16)-C(15)-Te(1)   | 106.0(4)   |
|           | C(23)-C(28)   | 1.348(10)  | O(2)-C(16)-N(2)     | 122.6(6)   |
|           | C(24)-C(25)   | 1.349(11)  | O(2)-C(16)-C(15)    | 120.4(6)   |
|           | C(25)-C(26)   | 1.352(13)  | N(2)-C(16)-C(15)    | 116.9(5)   |
|           | C(26)-C(27)   | 1.353(14)  | C(18)-C(17)-N(2)    | 120.7(6)   |
|           | C(27)-C(28)   | 1.400(12)  | C(22)-C(17)-N(2)    | 119.3(7)   |
|           |               |            | C(22)-C(17)-C(18)   | 120.0(7)   |
|           |               |            | C(19)-C(18)-C(17)   | 118.2(8)   |
|           |               |            | C(20)-C(19)-C(18)   | 121.7(9)   |
|           |               |            | C(21)-C(20)-C(19)   | 120.1(8)   |
|           |               |            | C(20)-C(21)-C(22)   | 119.2(8)   |
|           |               |            | C(17)-C(22)-C(21)   | 120.8(8)   |
|           |               |            | C(24)-C(23)-N(2)    | 120.8(6)   |
|           |               |            | C(28)-C(23)-N(2)    | 120.2(6)   |
|           |               |            | C(28)-C(23)-C(24)   | 118.9(7)   |
|           |               |            | C(25)-C(24)-C(23)   | 120.1(8)   |
|           |               |            | C(24)-C(25)-C(26)   | 120.5(8)   |
|           |               |            | C(25)-C(26)-C(27)   | 121.5(9)   |
|           |               |            | C(26)-C(27)-C(28)   | 117.9(9)   |
|           |               |            | C(23)-C(28)-C(27)   | 121.2(8)   |
| <b>C2</b> | Te(1)-C(14)   | 2.138(4)   | C(14)-Te(1)-Pd(1)   | 96.61(11)  |
|           | Te(1)-C(15)   | 2.129(4)   | C(15)-Te(1)-Pd(1)   | 104.69(10) |
|           | Te(1)-Pd(1)   | 2.4982(5)  | C(15)-Te(1)-C(14)   | 90.36(15)  |
|           | Pd(1)-Cl(1)   | 2.2766(11) | Cl(1)-Pd(1)-Te(1)   | 83.36(3)   |
|           | Pd(1)-Cl(2)   | 2.3035(11) | Cl(2)-Pd(1)-Te(1)   | 96.54(3)   |
|           | Pd(1)-Cl(2)#1 | 2.4148(11) | Cl(2)-Pd(1)-Te(1)#1 | 175.61(3)  |
|           | O(1)-C(13)    | 1.224(4)   | Cl(2)-Pd(1)-Cl(1)   | 92.81(4)   |
|           | O(2)-C(16)    | 1.215(5)   | Cl(2)-Pd(1)-Cl(1)   | 176.11(5)  |
|           | N(1)-C(1)     | 1.446(5)   | C(7)-N(1)-C(1)      | 117.1(3)   |
|           | N(1)-C(7)     | 1.446(5)   | C(13)-N(1)-C(1)     | 124.9(3)   |
|           | N(1)-C(13)    | 1.350(5)   | C(13)-N(1)-C(7)     | 117.9(3)   |
|           | N(2)-C(16)    | 1.359(5)   | C(17)-N(2)-C(16)    | 122.9(3)   |
|           | N(2)-C(17)    | 1.440(5)   | C(23)-N(2)-C(16)    | 119.8(4)   |
|           | N(2)-C(23)    | 1.446(5)   | C(23)-N(2)-C(17)    | 117.3(3)   |
|           | C(1)-C(2)     | 1.357(7)   | C(2)-C(1)-N(1)      | 119.9(5)   |
|           | C(1)-C(6)     | 1.344(7)   | C(6)-C(1)-N(1)      | 119.5(5)   |
|           | C(2)-C(3)     | 1.390(8)   | C(6)-C(1)-C(2)      | 120.6(5)   |
|           | C(3)-C(4)     | 1.377(13)  | C(3)-C(2)-C(1)      | 118.3(7)   |
|           | C(4)-C(5)     | 1.313(14)  | C(4)-C(3)-C(2)      | 120.5(9)   |
|           | C(5)-C(6)     | 1.383(10)  | C(5)-C(4)-C(3)      | 119.6(9)   |
|           | C(7)-C(8)     | 1.368(6)   | C(6)-C(5)-C(4)      | 120.7(11)  |
|           | C(7)-C(12)    | 1.375(6)   | C(5)-C(6)-C(1)      | 120.3(8)   |
|           | C(8)-C(9)     | 1.377(7)   | C(8)-C(7)-N(1)      | 119.8(4)   |
|           | C(9)-C(10)    | 1.356(8)   | C(12)-C(7)-N(1)     | 119.9(4)   |
|           | C(10)-C(11)   | 1.357(8)   | C(12)-C(7)-C(8)     | 120.3(4)   |
|           | C(11)-C(12)   | 1.392(7)   | C(9)-C(8)-C(7)      | 120.0(5)   |
|           | C(13)-C(14)   | 1.503(5)   | C(10)-C(9)-C(8)     | 120.0(6)   |

|           |             |           |                   |           |
|-----------|-------------|-----------|-------------------|-----------|
|           | C(15)-C(16) | 1.501(5)  | C(11)-C(10)-C(9)  | 120.6(6)  |
|           | C(17)-C(18) | 1.371(6)  | C(12)-C(11)-C(10) | 120.4(6)  |
|           | C(17)-C(22) | 1.381(6)  | C(11)-C(12)-C(7)  | 118.7(5)  |
|           | C(18)-C(19) | 1.387(7)  | N(1)-C(13)-O(1)   | 122.1(4)  |
|           | C(19)-C(20) | 1.353(9)  | C(14)-C(13)-O(1)  | 120.2(4)  |
|           | C(19)-C(20) | 1.353(9)  | C(14)-C(13)-N(1)  | 117.7(4)  |
|           | C(20)-C(21) | 1.350(9)  | C(13)-C(14)-Te(1) | 110.4(3)  |
|           | C(21)-C(22) | 1.398(7)  | C(16)-C(15)-Te(1) | 106.7(3)  |
|           | C(23)-C(24) | 1.360(6)  | N(2)-C(16)-O(2)   | 123.7(4)  |
|           | C(23)-C(28) | 1.341(6)  | C(15)-C(16)-O(2)  | 119.7(4)  |
|           | C(24)-C(25) | 1.375(6)  | C(15)-C(16)-N(2)  | 116.5(4)  |
|           | C(25)-C(26) | 1.366(7)  | C(18)-C(17)-N(2)  | 119.2(4)  |
|           | C(26)-C(27) | 1.347(7)  | C(22)-C(17)-N(2)  | 120.3(4)  |
|           | C(27)-C(28) | 1.385(7)  | C(22)-C(17)-C(18) | 120.5(5)  |
|           |             |           | C(19)-C(18)-C(17) | 119.1(6)  |
|           |             |           | C(20)-C(19)-C(18) | 121.3(7)  |
|           |             |           | C(21)-C(20)-C(19) | 119.3(7)  |
|           |             |           | C(22)-C(21)-C(20) | 121.7(6)  |
|           |             |           | C(21)-C(22)-C(17) | 118.0(5)  |
|           |             |           | C(24)-C(23)-N(2)  | 119.9(4)  |
|           |             |           | C(28)-C(23)-N(2)  | 120.5(4)  |
|           |             |           | C(28)-C(23)-C(24) | 119.6(4)  |
|           |             |           | C(25)-C(24)-C(23) | 120.8(5)  |
|           |             |           | C(26)-C(25)-C(24) | 119.4(5)  |
|           |             |           | C(27)-C(26)-C(25) | 119.6(5)  |
|           |             |           | C(28)-C(27)-C(26) | 120.5(6)  |
|           |             |           | C(27)-C(28)-C(23) | 120.1(5)  |
| <b>C3</b> | Te(1)-Pd(1) | 2.586(4)  | C(14)-Te(1)-Pd(1) | 100.5(2)  |
|           | Te(1)-C(14) | 2.188(7)  | C(15)-Te(1)-Pd(1) | 100.1(2)  |
|           | Te(1)-C(15) | 2.183(6)  | C(15)-Te(1)-C(14) | 93.9(2)   |
|           | Pd(1)-Cl(1) | 2.378(3)  | Cl(1)-Pd(1)-Te(1) | 88.98(12) |
|           | Pd(1)-Cl(2) | 2.383(4)  | Cl(1)-Pd(1)-Cl(2) | 90.99(13) |
|           | Pd(1)-P(1)  | 2.290(3)  | Cl(2)-Pd(1)-Te(1) | 175.43(5) |
|           | P(1)-C(29)  | 1.854(7)  | P(1)-Pd(1)-Te(1)  | 93.21(12) |
|           | P(1)-C(35)  | 1.839(7)  | P(1)-Pd(1)-Cl(1)  | 174.76(6) |
|           | P(1)-C(41)  | 1.840(7)  | P(1)-Pd(1)-Cl(2)  | 87.20(13) |
|           | O(1)-C(13)  | 1.243(6)  | C(29)-P(1)-Pd(1)  | 110.5(2)  |
|           | O(2)-C(16)  | 1.243(7)  | C(35)-P(1)-Pd(1)  | 119.1(2)  |
|           | N(1)-C(6)   | 1.453(7)  | C(35)-P(1)-C(29)  | 103.3(3)  |
|           | N(1)-C(7)   | 1.458(7)  | C(35)-P(1)-C(41)  | 103.6(3)  |
|           | N(1)-C(13)  | 1.379(7)  | C(41)-P(1)-Pd(1)  | 111.6(2)  |
|           | N(2)-C(16)  | 1.392(8)  | C(41)-P(1)-C(29)  | 107.9(3)  |
|           | N(2)-C(17)  | 1.481(8)  | C(6)-N(1)-C(7)    | 117.7(5)  |
|           | N(2)-C(23)  | 1.469(8)  | C(13)-N(1)-C(6)   | 120.0(5)  |
|           | C(1)-C(2)   | 1.405(10) | C(13)-N(1)-C(7)   | 122.2(5)  |
|           | C(1)-C(6)   | 1.382(8)  | C(16)-N(2)-C(17)  | 123.2(5)  |
|           | C(2)-C(3)   | 1.374(10) | C(16)-N(2)-C(23)  | 119.1(5)  |
|           | C(3)-C(4)   | 1.376(11) | C(23)-N(2)-C(17)  | 117.4(5)  |
|           | C(4)-C(5)   | 1.437(10) | C(6)-C(1)-C(2)    | 120.6(7)  |
|           | C(5)-C(6)   | 1.387(9)  | C(3)-C(2)-C(1)    | 119.7(7)  |
|           | C(7)-C(8)   | 1.416(9)  | C(2)-C(3)-C(4)    | 121.2(8)  |
|           | C(7)-C(12)  | 1.406(9)  | C(3)-C(4)-C(5)    | 119.1(8)  |
|           | C(8)-C(9)   | 1.392(10) | C(6)-C(5)-C(4)    | 119.5(7)  |
|           | C(9)-C(10)  | 1.381(12) | C(1)-C(6)-N(1)    | 121.5(6)  |
|           | C(10)-C(11) | 1.412(11) | C(1)-C(6)-C(5)    | 119.9(6)  |

|             |           |                   |           |
|-------------|-----------|-------------------|-----------|
| C(11)-C(12) | 1.406(10) | C(5)-C(6)-N(1)    | 118.6(5)  |
| C(13)-C(14) | 1.538(8)  | C(8)-C(7)-N(1)    | 119.8(6)  |
| C(15)-C(16) | 1.543(8)  | C(12)-C(7)-N(1)   | 123.2(5)  |
| C(17)-C(18) | 1.380(9)  | C(12)-C(7)-C(8)   | 117.0(6)  |
| C(17)-C(22) | 1.353(8)  | C(9)-C(8)-C(7)    | 120.9(8)  |
| C(18)-C(19) | 1.397(9)  | C(10)-C(9)-C(8)   | 121.0(8)  |
| C(19)-C(20) | 1.369(11) | C(9)-C(10)-C(11)  | 120.1(8)  |
| C(20)-C(21) | 1.406(12) | C(12)-C(11)-C(10) | 118.2(8)  |
| C(21)-C(22) | 1.399(10) | C(7)-C(12)-C(11)  | 122.5(7)  |
| C(23)-C(24) | 1.417(10) | O(1)-C(13)-N(1)   | 124.1(5)  |
| C(23)-C(28) | 1.371(11) | O(1)-C(13)-C(14)  | 119.7(5)  |
| C(24)-C(25) | 1.401(10) | N(1)-C(13)-C(14)  | 116.2(5)  |
| C(25)-C(26) | 1.361(15) | C(13)-C(14)-Te(1) | 104.8(4)  |
| C(26)-C(27) | 1.393(17) | C(16)-C(15)-Te(1) | 105.4(4)  |
| C(27)-C(28) | 1.433(14) | O(2)-C(16)-N(2)   | 123.3(5)  |
| C(29)-C(30) | 1.436(8)  | O(2)-C(16)-C(15)  | 120.1(6)  |
| C(29)-C(34) | 1.401(9)  | C(28)-C(23)-C(24) | 120.1(7)  |
| C(30)-C(31) | 1.383(9)  | C(25)-C(24)-C(23) | 122.1(9)  |
| C(31)-C(32) | 1.400(11) | C(26)-C(25)-C(24) | 114.5(12) |
| C(32)-C(33) | 1.410(11) | C(25)-C(26)-C(27) | 127.7(13) |
| C(33)-C(34) | 1.402(10) | C(26)-C(27)-C(28) | 115.4(13) |
| C(35)-C(36) | 1.422(8)  | C(23)-C(28)-C(27) | 120.2(10) |
| C(35)-C(40) | 1.407(8)  | C(30)-C(29)-P(1)  | 119.5(5)  |
| C(36)-C(37) | 1.426(9)  | C(34)-C(29)-P(1)  | 121.6(5)  |
| C(37)-C(38) | 1.380(10) | C(34)-C(29)-C(30) | 118.8(6)  |
| C(38)-C(39) | 1.395(11) | C(31)-C(30)-C(29) | 120.6(6)  |
| C(39)-C(40) | 1.427(9)  | C(30)-C(31)-C(32) | 121.1(7)  |
| C(41)-C(42) | 1.382(9)  | C(31)-C(32)-C(33) | 118.2(7)  |
| C(41)-C(46) | 1.414(9)  | C(36)-C(35)-P(1)  | 120.8(5)  |
| C(42)-C(43) | 1.399(10) | C(40)-C(35)-P(1)  | 121.7(5)  |
| C(43)-C(44) | 1.375(11) | C(40)-C(35)-C(36) | 117.5(6)  |
| C(44)-C(45) | 1.407(11) | C(35)-C(36)-C(37) | 121.1(6)  |
| C(45)-C(46) | 1.410(10) | C(38)-C(37)-C(36) | 120.0(7)  |
|             |           | C(37)-C(38)-C(39) | 120.2(7)  |
|             |           | C(38)-C(39)-C(40) | 120.2(7)  |
|             |           | C(35)-C(40)-C(39) | 120.9(7)  |
|             |           | C(42)-C(41)-P(1)  | 124.4(6)  |
|             |           | C(42)-C(41)-C(46) | 117.4(6)  |
|             |           | C(46)-C(41)-P(1)  | 118.2(5)  |
|             |           | C(41)-C(42)-C(43) | 122.4(8)  |
|             |           | C(44)-C(43)-C(42) | 119.7(8)  |
|             |           | C(43)-C(44)-C(45) | 120.6(8)  |
|             |           | C(44)-C(45)-C(46) | 118.6(8)  |
|             |           | C(45)-C(46)-C(41) | 121.3(7)  |

**Table S3.****Parametric details of D–H···A interactions.**

|           | D–H···A             | d(D–H) (Å) | d(H···A) (Å) | d(D···A) (Å) | <(DHA) (°) | Symmetry operation |
|-----------|---------------------|------------|--------------|--------------|------------|--------------------|
| <b>L1</b> | C(11)–H(11)···O1    | 0.93       | 2.610        | 3.499(4)     | 160.3      | 1-x, y, 1/2-z      |
| <b>L2</b> | C(7)–H(7)···O1      | 0.93       | 2.478        | 3.225(5)     | 137.5      | -x, 1-y, -z        |
|           | C(22)–H(22)···O1    | 0.93       | 2.642        | 3.305(4)     | 128.8      | -x, 1-y, -z        |
|           | C(28)–H(28)···O2    | 0.93       | 2.569        | 3.412(4)     | 150.9      | -x, 1-y, -z        |
| <b>C1</b> | C(11)–H(11)···Br(1) | 0.93       | 3.035        | 3.726(2)     | 132.5      | 1-x, 2-y, 1-z      |
|           | C(18)–H(18)···O(2)  | 0.93       | 2.583        | 3.425(2)     | 150.7      | 2-x, 2-y, 2-z      |
| <b>C2</b> | C(10)–H(10)···Cl(1) | 0.93       | 2.843        | 3.713(7)     | 156.1      | 2-x, 1-y, 1-z      |

C-C couplin reaction:<sup>2</sup>

4-Phenylbenzaldehyde:

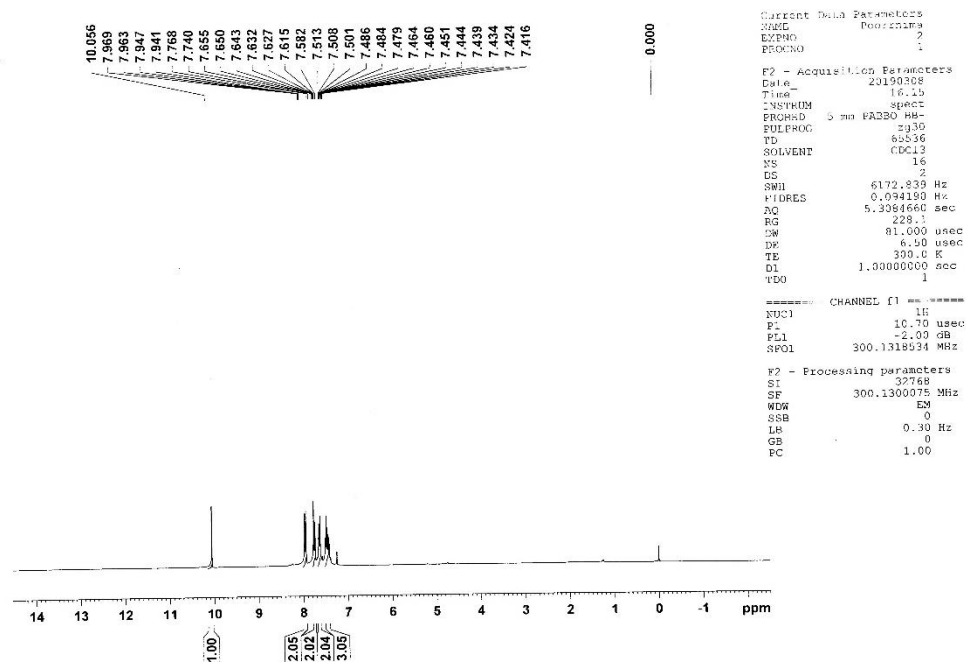

4-Nitrophenyl:

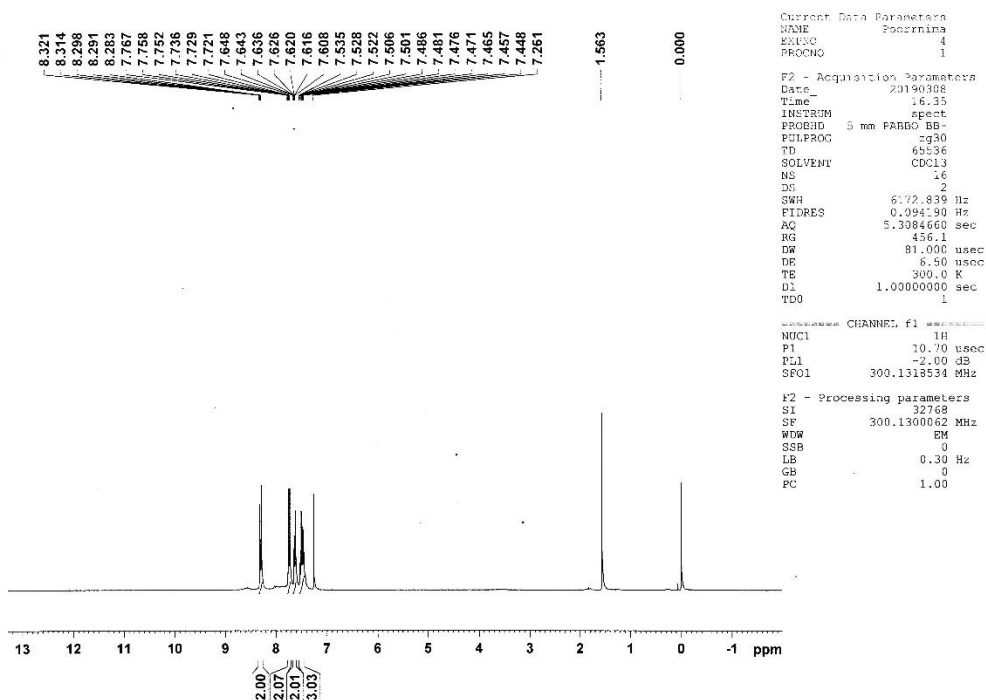

**4-Methylbiphenyl:**

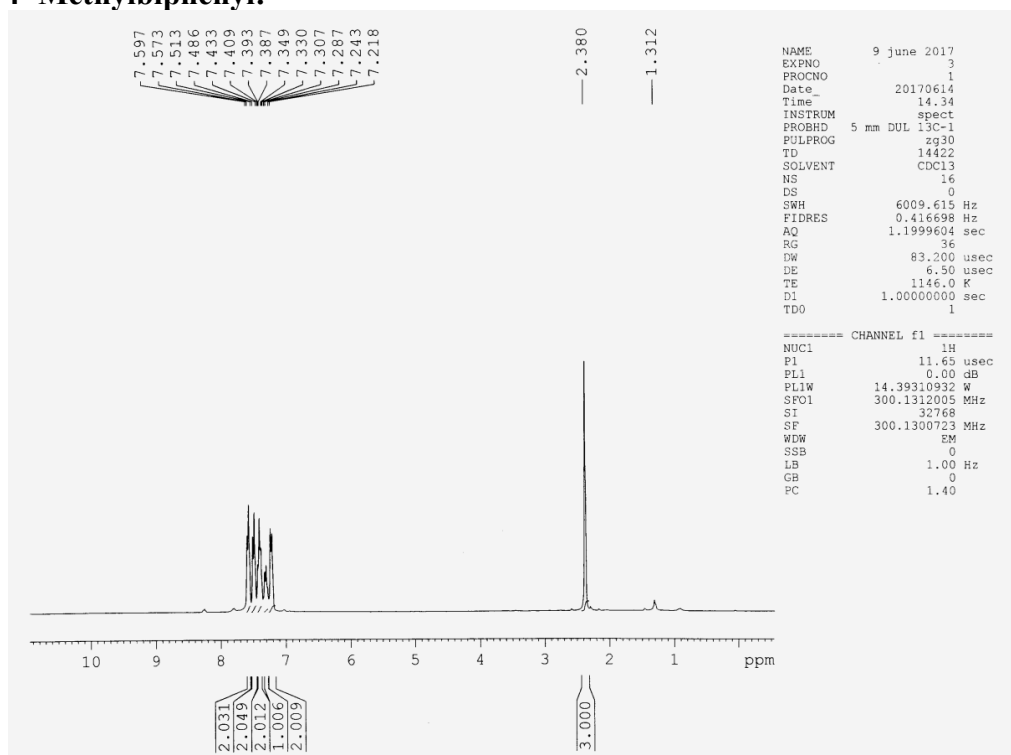

**4-Phenylbenzotrile:**

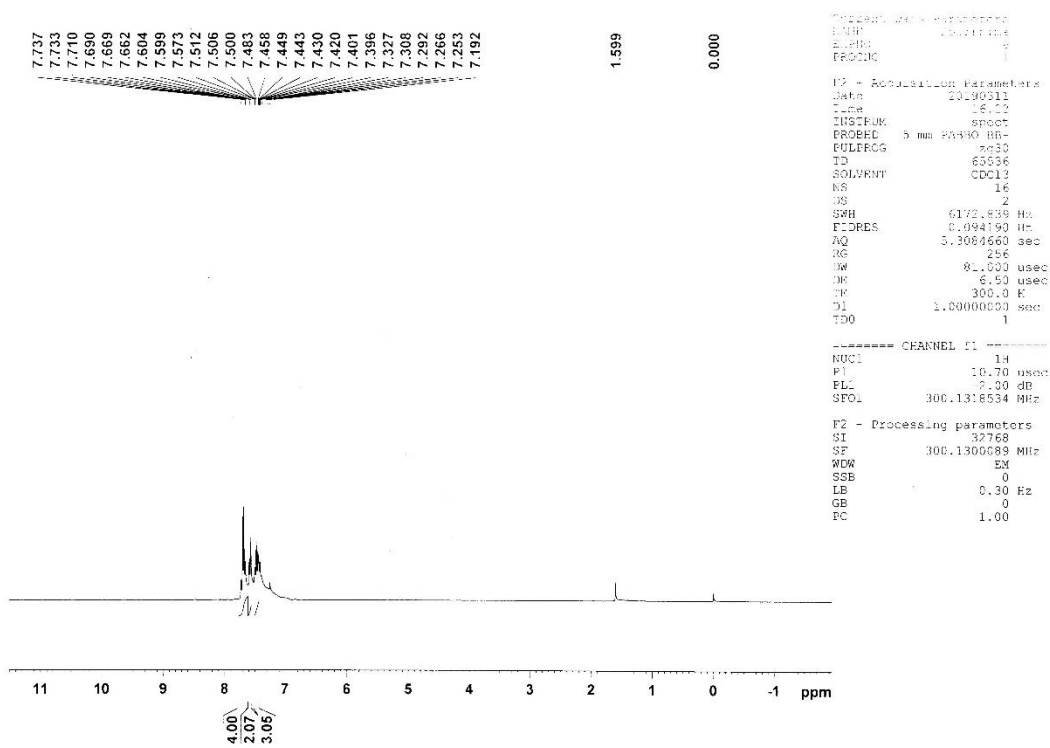

## 4-Methoxybiphenyl:

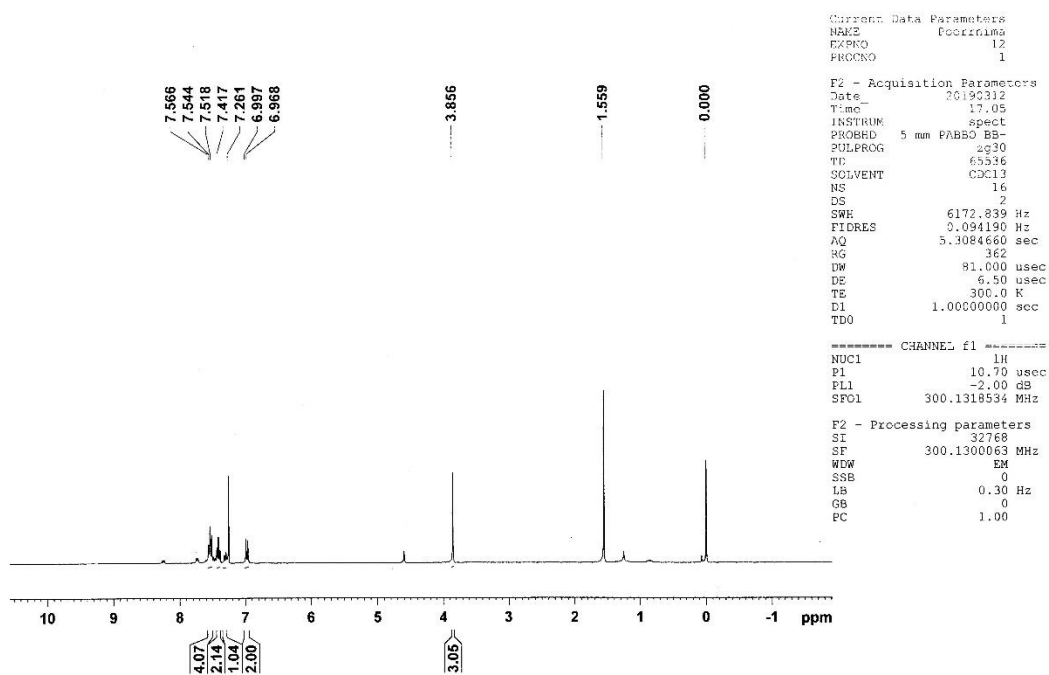

## 4-Acetylbiphenyl:

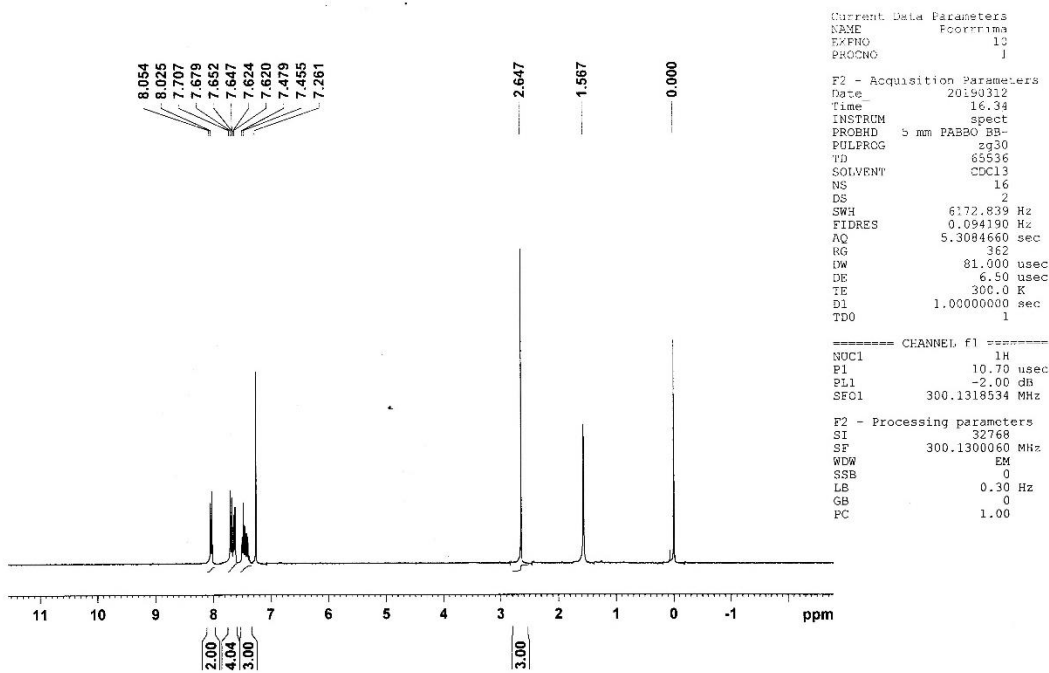

## Biphenyl:

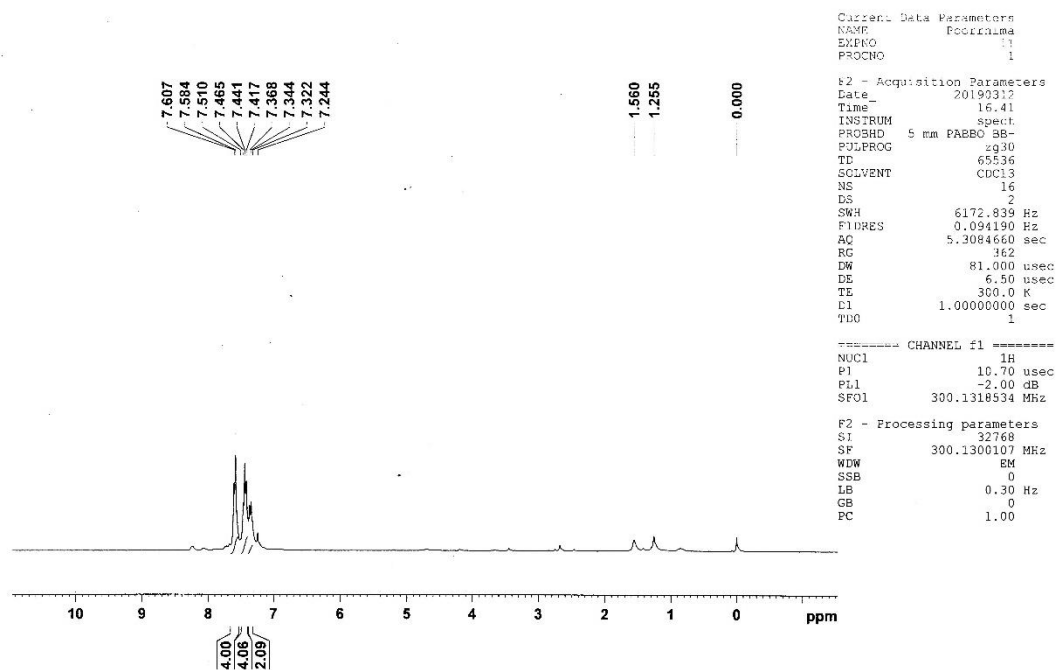

## References

1. B. S. Furniss, A. J. Hannaford, P. W. G. Smith and A. R. Tatchell, *Vogel's Textbook of Practical Organic Chemistry*, ELBS, Longman Group U K Ltd., 5th edn, 1989, pp. 1–1514.
2. P. Singh, A. K. Singh, *Dalton Trans.*, 2017, **46**, 10037.
